# Supplementary material for: MiR-630 Promotes Radioresistance by Induction of Anti-Apoptotic Effect via Nrf2–GPX2 Molecular Axis in Head–Neck Cancer
Source: MDPI journal article supplement (doi:10.3390/cells12242853), 2023-12-17
Supplement: s1 [file s1]

**Table S1.** Clinical characteristics of patients recruited in this study.

| Item                            | Cancer          | Normal          |
|---------------------------------|-----------------|-----------------|
| <b>Gender</b>                   |                 |                 |
| Male                            | 62 (86%)        | 30 (88%)        |
| Female                          | 10 (14%)        | 4 (12%)         |
| <b>Age</b>                      |                 |                 |
| Range (year old)                | 32-80           | 23-80           |
| Mean $\pm$ SD (years)           | 52.6 $\pm$ 10.3 | 50.8 $\pm$ 12.5 |
| $\leq$ 40 years old             | 9 (13%)         | 6 (18%)         |
| 41-50 years old                 | 20 (28%)        | 9 (26%)         |
| 51-60 years old                 | 26 (36%)        | 12 (35%)        |
| $\geq$ 61years old              | 17 (23%)        | 7 (21%)         |
| <b>Habits</b>                   |                 |                 |
| Alcohol drinking                | 24 (33%)        |                 |
| Betel quid chewing              | 37 (51%)        |                 |
| Cigarette smoking               | 44 (61%)        |                 |
| <b>Pathologic T-status</b>      |                 |                 |
| T1-T2                           | 44 (61%)        |                 |
| T3-T4                           | 28 (39%)        |                 |
| <b>Pathologic N-status</b>      |                 |                 |
| pN 0                            | 29 (40%)        |                 |
| pN+                             | 43 (60%)        |                 |
| <b>Pathologic overall stage</b> |                 |                 |
| I - II                          | 28 (39%)        |                 |
| III - IV                        | 44 (61%)        |                 |
| <b>Total</b>                    | 72 (100%)       | 34 (100%)       |
