# Supplementary material for: MiR-630 Promotes Radioresistance by Induction of Anti-Apoptotic Effect via Nrf2–GPX2 Molecular Axis in Head–Neck Cancer
Source: MDPI journal article supplement (doi:10.3390/cells12242853), 2023-12-17
Supplement: s1 [file s1]

**Table S3.** List of the antibodies used in the present study.

| <b>Antibody</b>                   | <b>Catalog number (Company)</b>                     |
|-----------------------------------|-----------------------------------------------------|
| Bak                               | #12105 (Cell Signaling Technology Danvers, MA, USA) |
| Bax                               | #5023 (Cell Signaling Technology Danvers, MA, USA)  |
| $\beta$ -actin                    | NB600-501 (Novus, Centennial, CO, USA)              |
| C-Caspase-3                       | #9664 (Cell Signaling Technology Danvers, MA, USA)  |
| P-Caspase-3                       | #14220 (Cell Signaling Technology Danvers, MA, USA) |
| C-Caspase-7                       | #8438 (Cell Signaling Technology Danvers, MA, USA)  |
| P-Caspase-7                       | #12827 (Cell Signaling Technology Danvers, MA, USA) |
| C-Caspase-9                       | #52873 (Cell Signaling Technology Danvers, MA, USA) |
| P-Caspase-9                       | #9508 (Cell Signaling Technology Danvers, MA, USA)  |
| $\gamma$ -H2AX                    | ab2893 (Abcam, Cambridge, UK)                       |
| Nrf2                              | #12721 (Cell Signaling Technology Danvers, MA, USA) |
| GPX2                              | ab137431 (Abcam, Cambridge, UK)                     |
| Anti-rabbit IgG-HRP               | #7074 (Cell Signaling Technology Danvers, MA, USA)  |
| Anti-mouse IgG-HRP                | #7076 (Cell Signaling Technology Danvers, MA, USA)  |
| Anti-rabbit IgG- Alexa Fluor® 488 | A21206 (Invitrogen, Carlsbad, CA, USA)              |
