# Supplementary material for: MiR-630 Promotes Radioresistance by Induction of Anti-Apoptotic Effect via Nrf2–GPX2 Molecular Axis in Head–Neck Cancer
Source: MDPI journal article supplement (doi:10.3390/cells12242853), 2023-12-17
Supplement: s1 [file s1]

**Table S2.** List of the primers used in the present study.

| <b>Gene</b> | <b>Primer Sequences (5' -&gt; 3')</b>               |
|-------------|-----------------------------------------------------|
| GCLC        | F: AACTCAGACATTGGATGGAG<br>R: ACCTTTGACAGTGGAATGAG  |
| GCLM        | F: AGGGAGTTTCCAGATGTCTT<br>R: AAGCAATGATCACAGAATCC  |
| GPX2        | F: TCATTGCCAAGTCCTTCTAT<br>R: TG TTCAGGATCTCCTCATTC |
| MnSOD       | F: CAAAGGGGAGTTGCTGGAAG<br>R: AGCAGTGGAATAAGGCCTGT  |
|             | F: GGAGCGAGATCCCTCCAAAAT                            |
| GAPDH       | R: GGCTGTTGTCATACTTCTCATGG                          |
